# Supplementary material
Source: PubMed Central journal article supplement (PMC6583662)
Supplement: jamapsychiatry-76-691-s002.pdf [file jamapsychiatry-76-691-s002.pdf]

## Supplementary Online Content

Brown HE, Freudenreich O, Fan X, et al. Efficacy and tolerability of adjunctive intravenous sodium nitroprusside treatment for outpatients with schizophrenia: a randomized clinical trial. *JAMA Psychiatry*. Published online March 27, 2019. doi:10.1001/jamapsychiatry.2019.0151

**eFigure 1.** Sequential Parallel Comparison Design (SPCD)

**eFigure 2.** Study Schema

**eTable 1.** Positive and Negative Syndrome Scale (PANSS) Scores Stratified by Treatment Status

**eTable 2.** Positive and Negative Syndrome Scale (PANSS) Scores Stratified by PANSS-Negative Subscores

**eTable 3.** Percentage of Participants Reporting Experiencing SAFTEE Symptoms at "Moderate" or "Severe" Level for the 10 Most Frequently Reported Symptoms Post Randomization

This supplementary material has been provided by the authors to give readers additional information about their work.

**eFigure 1.** Sequential Parallel Comparison Design (SPCD)

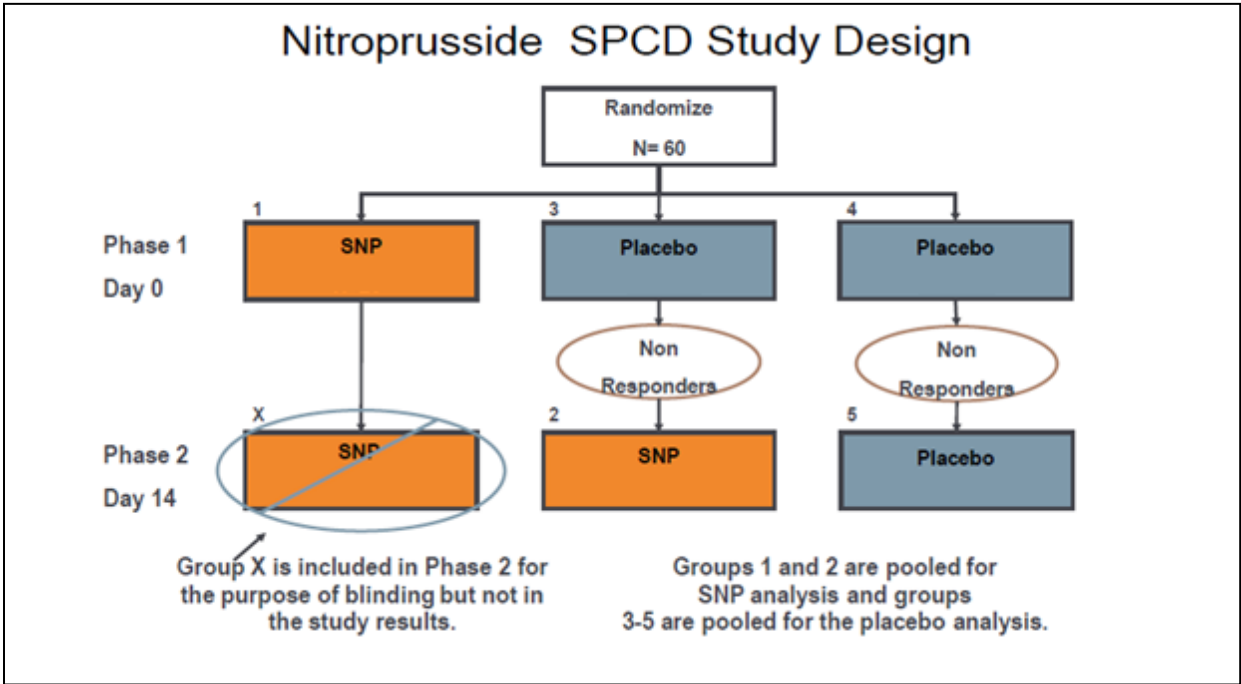

SPCD=Sequential Parallel Comparison Design; SNP=sodium nitroprusside

**eFigure 2. Study Schema**

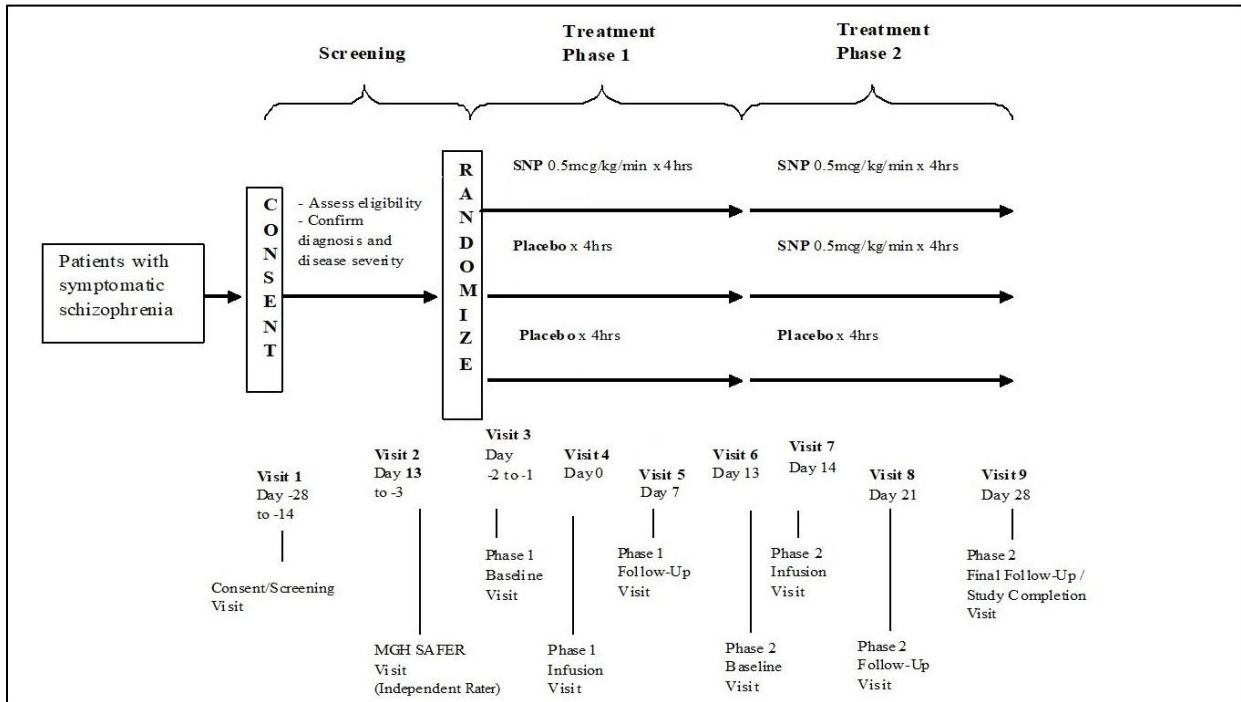

SNP=sodium nitroprusside; MGH=Massachusetts General Hospital

**eTable 1.** Positive and Negative Syndrome Scale (PANSS) Scores Stratified by Treatment Status

|                           |                                  | <b>Clozapine</b> |                 | <b>No Clozapine</b> |                 |
|---------------------------|----------------------------------|------------------|-----------------|---------------------|-----------------|
|                           |                                  | <i>n=19</i>      |                 | <i>n=33</i>         |                 |
|                           |                                  | <b>p-value</b>   | <b>estimate</b> | <b>p-value</b>      | <b>estimate</b> |
| Primary Outcome Measure   |                                  |                  |                 |                     |                 |
|                           | PANSS total (SPCD analysis)      | 0.41             | -1.85           | 0.57                | -1.50           |
| Secondary Outcome Measure |                                  |                  |                 |                     |                 |
|                           | PANSS - positive (SPCD analysis) | 0.41             | -0.83           | 0.55                | -0.60           |
|                           | PANSS - negative (SPCD analysis) | 0.79             | 0.29            | 0.79                | -0.22           |
|                           | PANSS - general (SPCD analysis)  | 0.55             | -1.08           | 0.97                | 0.06            |

SPCD=Sequential Parallel Comparison Design; PANSS=Positive and Negative Syndrome Scale

**eTable 2.** Positive and Negative Syndrome Scale (PANSS) Scores Stratified by PANSS-Negative Subscores

|                           |                                  | High PANSS-N<br><i>n=27</i> |          | Low PANSS-N<br><i>n=25</i> |          |
|---------------------------|----------------------------------|-----------------------------|----------|----------------------------|----------|
|                           |                                  | p-value                     | estimate | p-value                    | estimate |
| Primary Outcome Measure   |                                  |                             |          |                            |          |
|                           | PANSS total (SPCD analysis)      | 0.23                        | -2.95    | 0.66                       | 1.17     |
| Secondary Outcome Measure |                                  |                             |          |                            |          |
|                           | PANSS - positive (SPCD analysis) | 0.24                        | -1.06    | 0.86                       | 0.15     |
|                           | PANSS - negative (SPCD analysis) | 0.71                        | -0.35    | 0.94                       | -0.08    |
|                           | PANSS - general (SPCD analysis)  | 0.25                        | -1.59    | 0.41                       | 1.30     |

SPCD=Sequential Parallel Comparison Design; PANSS=Positive and Negative Syndrome Scale; PANSS-N= Positive and Negative Syndrome Scale, negative symptoms subscore

**eTable 3.** Percentage of Participants Reporting Experiencing SAFTEE Symptoms at "Moderate" or "Severe" Level for the 10 Most Frequently Reported Symptoms Post Randomization

| SAFTEE Symptoms          | SNP SNP     |       | Placebo SNP |     | Placebo Placebo |     | Total |
|--------------------------|-------------|-------|-------------|-----|-----------------|-----|-------|
|                          | <i>n=18</i> |       | <i>n=16</i> |     | <i>n=18</i>     |     |       |
|                          | BL          | FU    | BL          | FU  | BL              | FU  | FU    |
| Hearing or seeing things | 22%         | 33%   | 25.0%       | 31% | 22%             | 17% | 27%   |
| Feeling drowsy or sleepy | 17%         | 22.2% | 0.0%        | 25% | 22%             | 22% | 23%   |
| Trouble concentrating    | 17%         | 11.1% | 6%          | 19% | 22%             | 28% | 19%   |
| Poor memory              | 11%         | 5.6%  | 6%          | 25% | 28%             | 22% | 17%   |
| Trouble Sleeping         | 17%         | 11.1% | 6%          | 13% | 28%             | 22% | 15%   |
| Feeling nervous or hyper | 6%          | 5.6%  | 19%         | 19% | 33%             | 22% | 15%   |
| Dry mouth                | 6%          | 5.6%  | 13%         | 25% | 11%             | 17% | 15%   |
| Frequent need to urinate | 0%          | 5.6%  | 6%          | 19% | 11%             | 17% | 14%   |
| Stuffy nose              | 6%          | 5.6%  | 6%          | 19% | 17%             | 11% | 12%   |
| Hot flashes              | 0%          | 11.1% | 6%          | 6%  | 6%              | 17% | 12%   |

BL = reported at baseline; FU = reported at any assessment thereafter ("follow-up"), including 7 hours after infusions 1 and 2, Baseline 2 (Day 14), and final follow-up, including early termination visits; SNP = sodium nitroprusside; SAFTEE = Systematic Assessment for Treatment Emergent Effects
