# Supplementary material
Source: PubMed Central journal article supplement (PMC6583662)
Supplement: jamapsychiatry-76-691-s003.pdf [file jamapsychiatry-76-691-s003.pdf]

## Data Sharing Statement

Brown. Efficacy and Tolerability of Adjunctive Intravenous Sodium Nitroprusside Treatment for Outpatients With Schizophrenia. *JAMA Psychiatry*. Published March 27, 2019.  
10.1001/jamapsychiatry.2019.0151

### Data

**Data available:** No

### Additional Information

**Explanation for why data not available:** As the IRB protocol and consent form do not provide for data sharing, we are unable to make subject-level data available.
